# Supplementary material for: Ligand-induced isomerization: from 3D to 2D→3D POMOFs constructed from silicotungstate anions, Cu(i) and 1,n-di(4H-1,2,4-triazol-4-yl)benzene (n = 3, 4) ligands
Source: Royal Society of Chemistry journal article supplement (doi:10.1039/c6ce01174h), 2016-01-01
Supplement: c6ce01174h1.pdf [file c6ce01174h1.pdf]

## Ligand-induced isomerization, from 3D to 2D→3D POMOFs constructed by Keggin type of silicotungstate anions, Cu(I) and 1,n-di(4H-1,2,4-triazol-4-yl)benzene (n = 3, 4) ligands

Yan-Mei Chen,<sup>a</sup> Ying-Hui Yu,<sup>a</sup> Han-Zhong Zhang,<sup>a</sup> Guang-Feng Hou,<sup>\*ab</sup> Jin-Sheng Gao<sup>\*ab</sup> and Peng-Fei Yan<sup>a</sup>

**Table S1.** Selected bonds lengths (Å) and angles (°) for complexes **1** and **2**.

| Bonds (Å)                               | <b>1</b>  | Bonds (Å)                                 | <b>2</b>  |
|-----------------------------------------|-----------|-------------------------------------------|-----------|
| O7—Cu1                                  | 2.66 (2)  | Cu1—N19                                   | 1.947(1)  |
| Cu1—N11                                 | 1.95 (2)  | Cu1—N7                                    | 1.984(1)  |
| Cu1—N3 <sup>i</sup>                     | 1.97 (2)  | Cu1—N1                                    | 2.111(2)  |
| Cu1—N2                                  | 2.00 (2)  | Cu1—O29                                   | 2.569(1)  |
| Cu2—N5                                  | 2.003 (2) | Cu2—N20                                   | 1.868 (2) |
| Cu2—N6 <sup>ii</sup>                    | 2.021 (2) | Cu2—N13                                   | 1.951 (2) |
| Cu2—N9 <sup>iii</sup>                   | 2.071 (2) | Cu2—N2                                    | 1.999 (1) |
| Cu2—N8                                  | 2.105 (2) | Cu3—N16 <sup>v</sup>                      | 1.917 (1) |
|                                         |           | Cu3—N4                                    | 1.934 (1) |
|                                         |           | Cu3—N10 <sup>iv</sup>                     | 2.112 (2) |
|                                         |           | Cu4—N17 <sup>ii</sup>                     | 1.914 (2) |
|                                         |           | Cu4—N22 <sup>i</sup>                      | 1.945 (2) |
|                                         |           | Cu4—N11 <sup>iii</sup>                    | 2.013 (1) |
|                                         |           | Cu4—O22                                   | 2.455 (1) |
| Bond angles (°)                         | <b>1</b>  | Bond angles (°)                           | <b>2</b>  |
| N11—Cu1—N3 <sup>i</sup>                 | 128.0 (9) | N19—Cu1—N7                                | 141.0 (6) |
| N11—Cu1—N2                              | 111.9 (8) | N19—Cu1—N1                                | 113.0 (5) |
| N3 <sup>i</sup> —Cu1—N2                 | 119.3 (9) | N7—Cu1—N1                                 | 104.2 (6) |
| N5—Cu2—N6 <sup>ii</sup>                 | 115.9 (7) | N20—Cu2—N13                               | 136.8 (6) |
| N5—Cu2—N9 <sup>iii</sup>                | 108.2 (7) | N20—Cu2—N2                                | 113.9 (6) |
| N6 <sup>ii</sup> —Cu2—N9 <sup>iii</sup> | 118.2 (7) | N13—Cu2—N2                                | 109.2 (6) |
| N5—Cu2—N8                               | 113.0 (7) | N16 <sup>v</sup> —Cu3—N4                  | 142.0 (6) |
| N6 <sup>ii</sup> —Cu2—N8                | 104.9 (7) | N16 <sup>v</sup> —Cu3—N10 <sup>iv</sup>   | 112.2 (6) |
| N9 <sup>iii</sup> —Cu2—N8               | 94.6 (7)  | N4—Cu3—N10 <sup>iv</sup>                  | 105.7 (6) |
| N11—Cu1—N3 <sup>i</sup>                 | 128.0 (9) | N17 <sup>ii</sup> —Cu4—N22 <sup>i</sup>   | 134.4 (6) |
|                                         |           | N17 <sup>ii</sup> —Cu4—N11 <sup>iii</sup> | 113.5 (6) |
|                                         |           | N22 <sup>i</sup> —Cu4—N11 <sup>iii</sup>  | 111.9 (6) |

Symmetry code:

**1**, (i) 1.75-y, -0.25+x, 0.75-z; (ii) 0.25+y, 1.25-x, 0.25+z; (iii) 1.25-y, -0.25+x, -0.25+z; (iv) 2-x, 1-y, 1-z.

**2**, (i) 2-x, -y, 1-z; (ii) 2-x, -y, -z; (iii) 1-x, 1-y, 1-z; (iv) x, y, -1+z; (v) -1-x, 1+y, z.

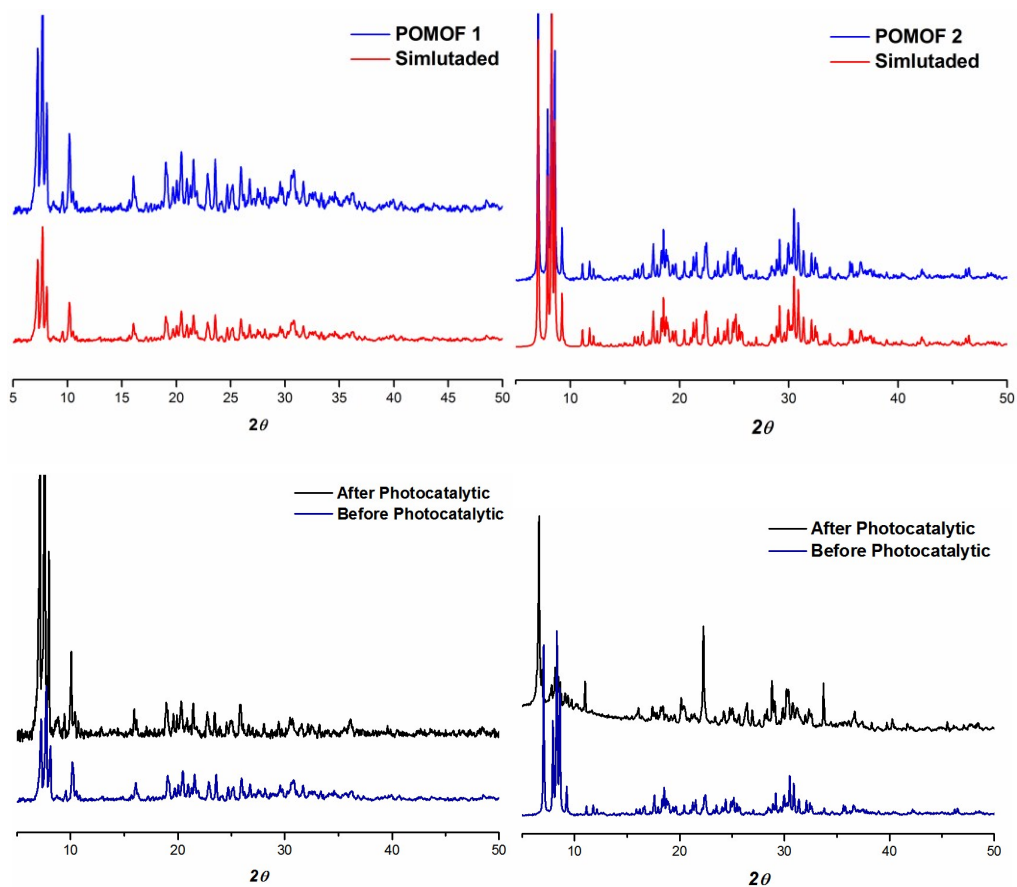

**Fig. S1** The simulative and experimental XRPD patterns of POMOF **1** and **2** (upside). The XRPD patterns of POMOF **1** and **2** before and after photocatalytic (underside).

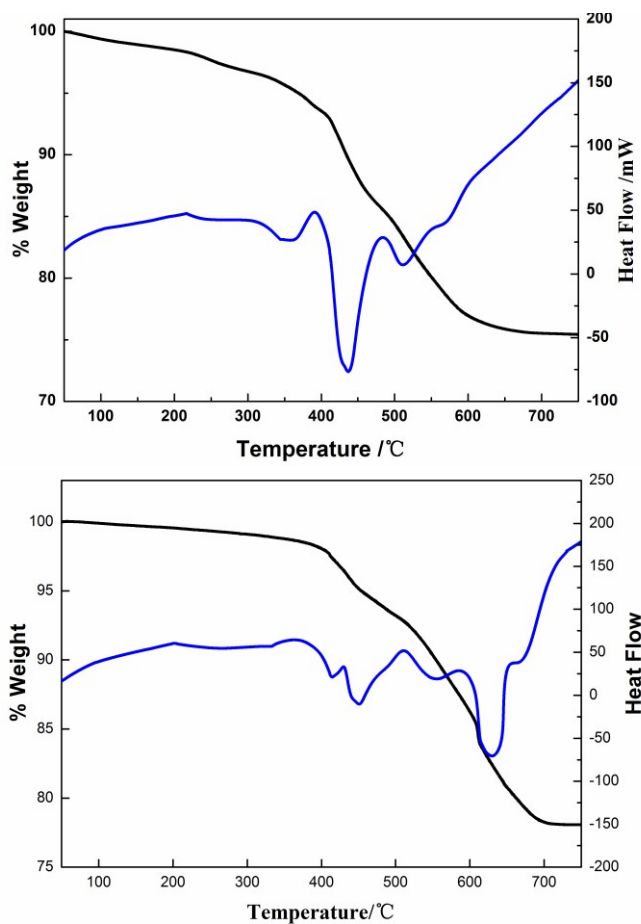

Fig. S2 Thermogravimetric analyses (TGA) of POMOFs 1 and 2.

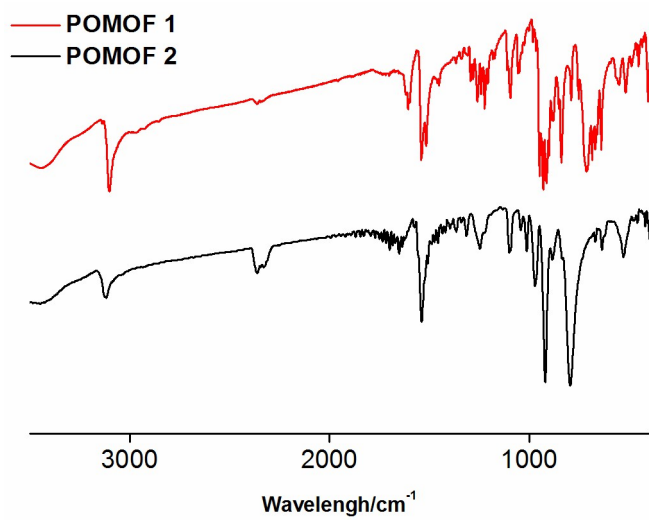

Fig. S3 IR spectra of POMOFs 1 and 2.
